# Supplementary material
Source: Springer Nature journal article supplement (https://www.springermedizin.de/resource/supplementary/12885_2013_3921_MOESM9_ESM.pdf/9464778)

**A**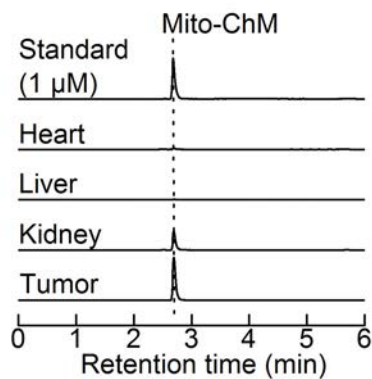**B**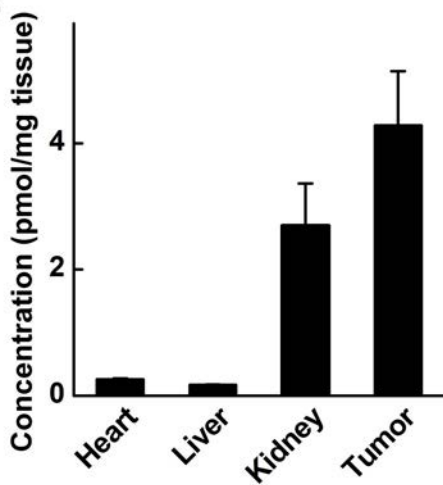**C**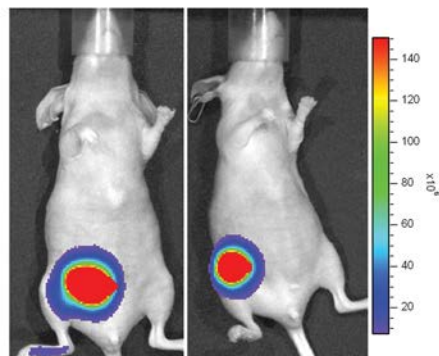**D**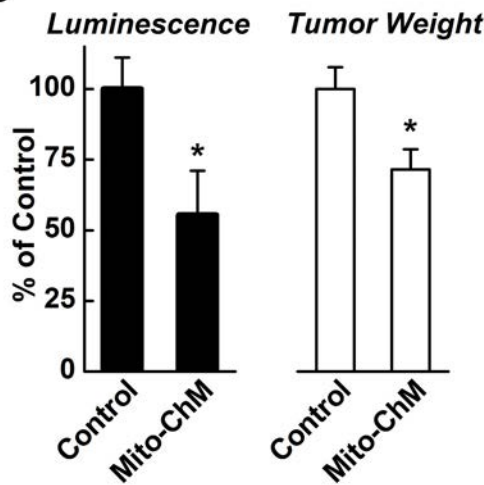

Supplement: MOESM9 [file 9464778]
